# Supplementary material for: Organic light-emitting diodes fabricated on a new transparent conducting anode: aluminium-doped zinc oxide
Source: MDPI journal article supplement (doi:10.3390/genes15010077), 2006-01-01
Supplement: s1 [file s1]

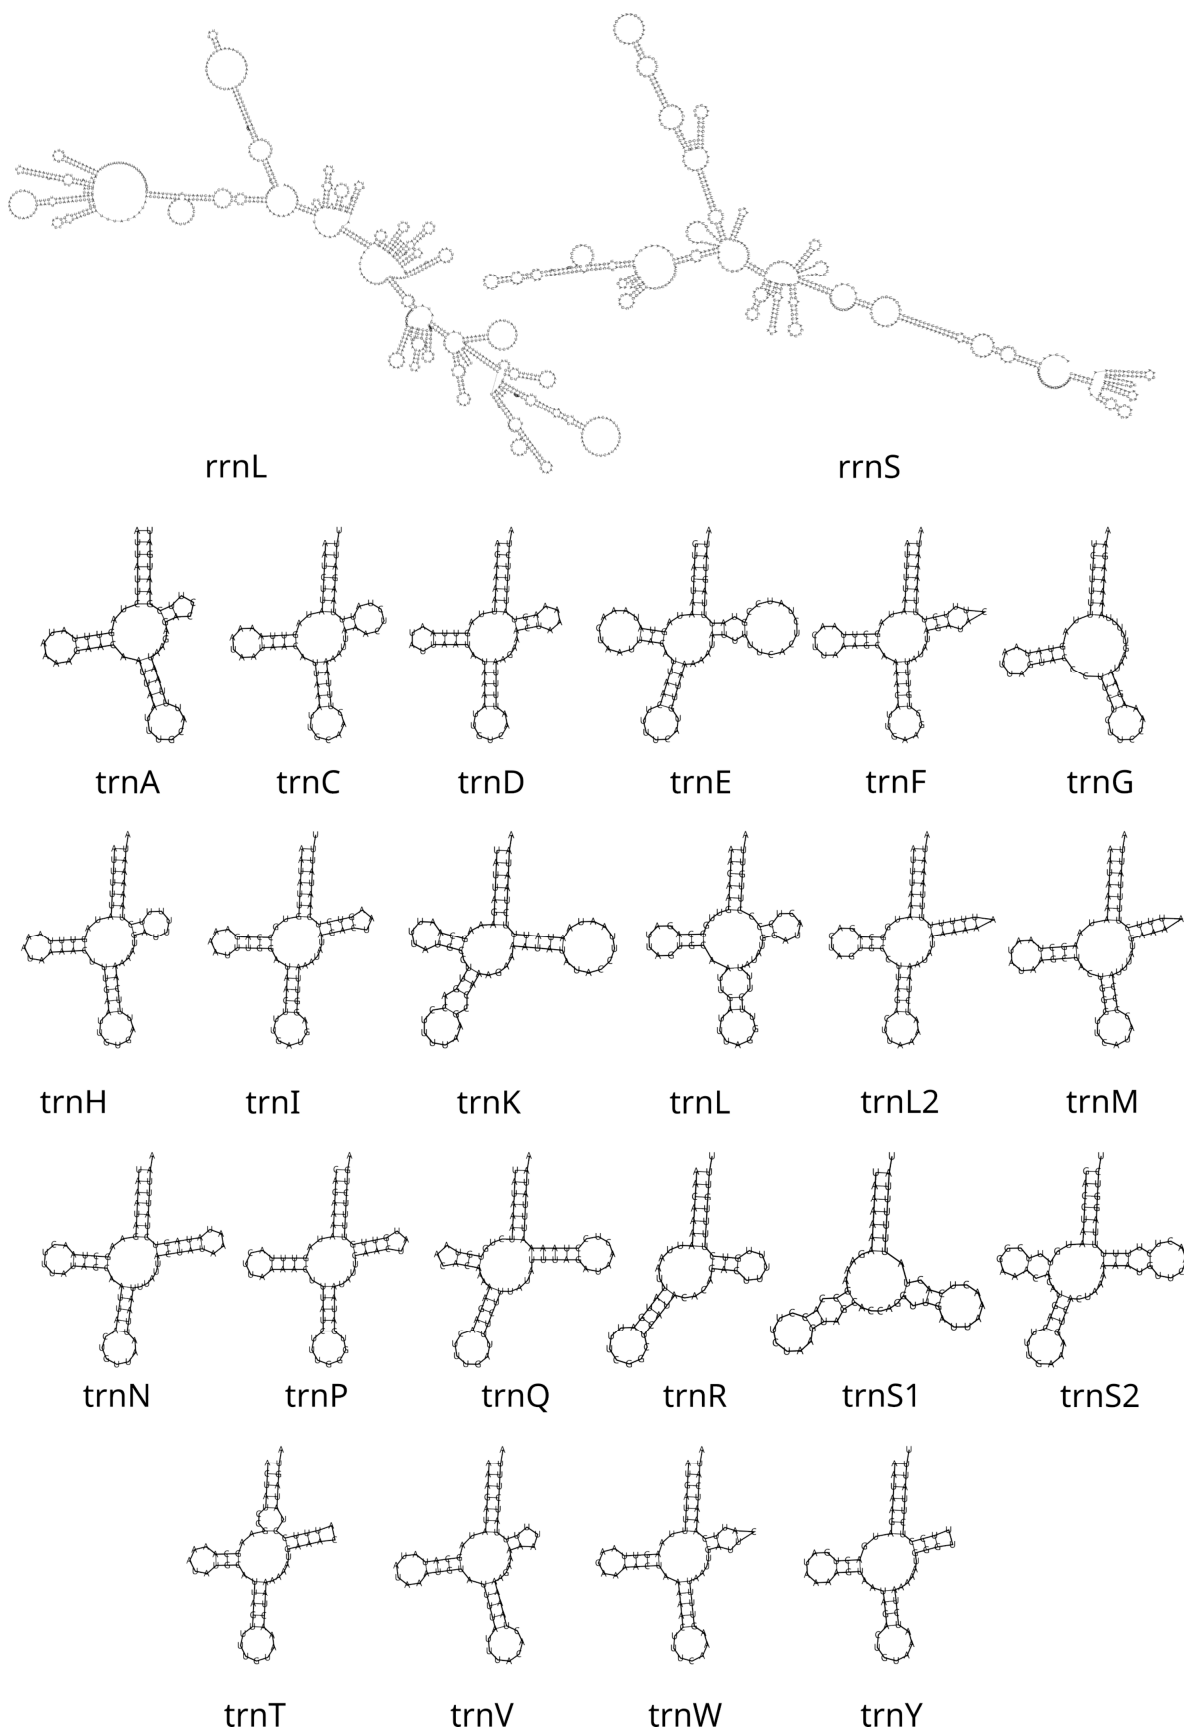

**Figure S1.** The putative secondary structures of ribosomal and transfer RNAs of *S. plumosum* mitogenome.

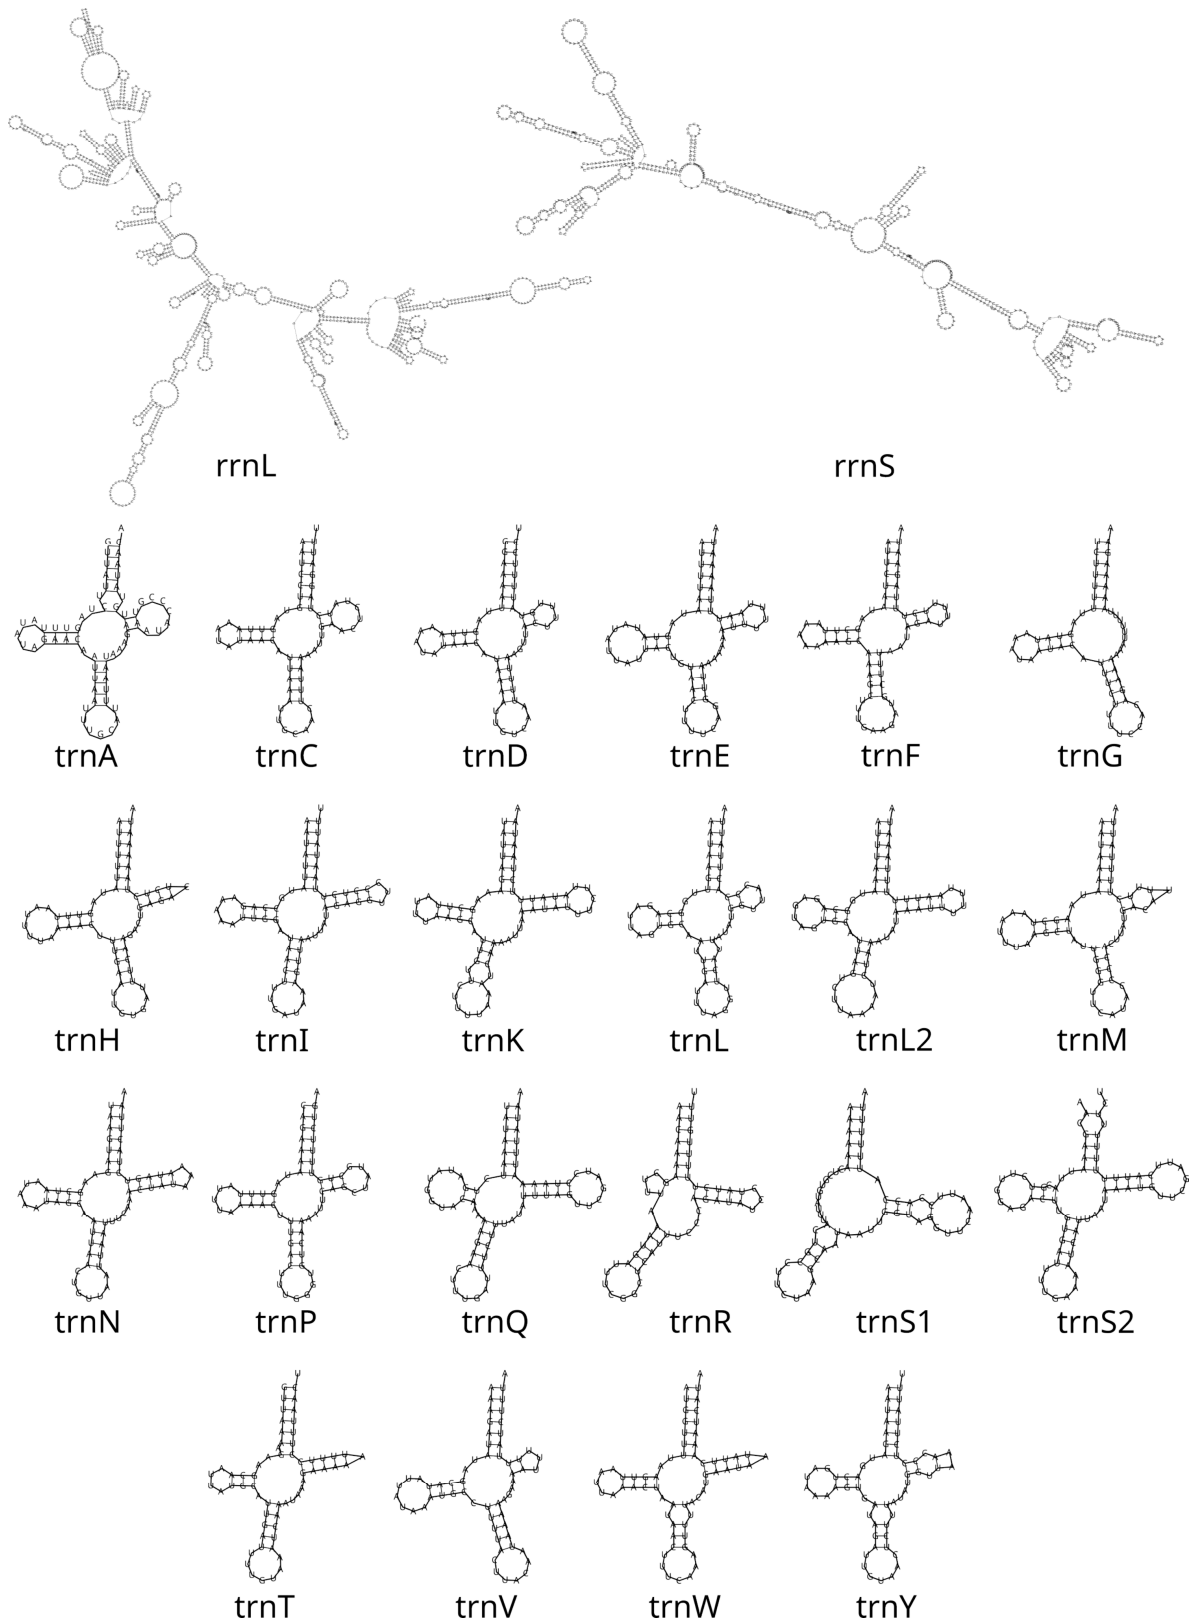

**Figure S2.** The putative secondary structures of ribosomal and transfer RNAs of *O. dogieli* mitogenome.

**Table S1.** NCBI Accession numbers of COX1 and 16S rRNA genes of siboglinid species used in single-gene phylogenetic analyses.

| NCBI Accession | Full name                                             | COI | 16S |
|----------------|-------------------------------------------------------|-----|-----|
| FJ480356.1     | Bobmarleya gadensis isolate 1                         | yes | no  |
| FJ480357.1     | Bobmarleya gadensis isolate AT615G3                   | yes | no  |
| NC_026857      | Galathealimum brachiosum                              | yes | yes |
| U74066.1       | Galathealimum brachiosum                              | yes | no  |
| FJ480376.1     | Lamellisabella denticulata isolate AT622-G4           | yes | no  |
| FJ480377.1     | Lamellisabella denticulata isolate Lam1               | yes | no  |
| FJ480388.1     | Lamellisabella sp. SBJ-2009 isolate Lam2              | yes | no  |
| OR804078.1     | Oligobrachia dogieli                                  | yes | yes |
| MK673146.1     | Oligobrachia haakonmosbiensis isolate AD3             | yes | no  |
| MK673147.1     | Oligobrachia haakonmosbiensis isolate AD4             | yes | no  |
| OP541392.1     | Oligobrachia haakonmosbiensis isolate BC2_5, Kvalsund | yes | no  |
| MH393883.1     | Oligobrachia haakonmosbiensis isolate BS1             | yes | no  |
| MH619672.1     | Oligobrachia haakonmosbiensis voucher 22              | yes | no  |
| MH619665.1     | Oligobrachia haakonmosbiensis voucher 23              | yes | no  |
| MH619669.1     | Oligobrachia haakonmosbiensis voucher 26              | yes | no  |
| MH619666.1     | Oligobrachia haakonmosbiensis voucher 28              | yes | no  |
| MH619671.1     | Oligobrachia haakonmosbiensis voucher 33              | yes | no  |
| MH619686.1     | Oligobrachia haakonmosbiensis voucher VI-023-Nyegga   | yes | no  |
| MH619683.1     | Oligobrachia haakonmosbiensis voucher VI-135-HMMV     | yes | no  |
| MH619685.1     | Oligobrachia haakonmosbiensis voucher VI-143-1-HMMV   | yes | no  |
| MH619661.1     | Oligobrachia sp. 1078-2                               | yes | no  |
| MH619674.1     | Oligobrachia sp. 1125-9                               | yes | no  |
| MH619680.1     | Oligobrachia sp. 1154-6                               | yes | no  |
| MW598476.1     | Oligobrachia sp. ovs3 voucher ZMMU-WS14754            | yes | no  |
| MH619687.1     | Oligobrachia sp. P11-LaptevSea                        | yes | no  |
| MK673155.1     | Oligobrachia sp. Vestnesa isolate AD13                | yes | no  |
| MK673149.1     | Oligobrachia sp. Vestnesa isolate AD6                 | yes | no  |
| MK673151.1     | Oligobrachia sp. Vestnesa isolate AD9                 | yes | no  |
| OP541394.1     | Oligobrachia webbi isolate voucher                    | yes | no  |
| FJ480393.1     | Polybrachia sp. 1 SBJ-2009 isolate BJG3               | yes | no  |
| FJ480389.1     | Polybrachia sp. 2 SBJ-2009 isolate Poly1              | yes | no  |
| FJ480391.1     | Polybrachia sp. 3 SBJ-2009 isolate Poly2              | yes | no  |
| FJ480392.1     | Polybrachia sp. 3 SBJ-2009 isolate Poly3              | yes | no  |
| AF315037.1     | Polybrachia sp. HRV-2001                              | no  | yes |
| KJ789169.1     | Siboglinum ekmani                                     | yes | yes |
| KF444429.1     | Siboglinum ekmani                                     | yes | no  |
| OP541395.1     | Siboglinum ekmani isolate St1 G1, Nordfjord           | yes | no  |
| OP541396.1     | Siboglinum ekmani isolate St1 G2_1, Nordfjord         | yes | no  |
| OP541397.1     | Siboglinum ekmani isolate St1 G2_2, Nordfjord         | yes | no  |
| NC_026833.1    | Siboglinum fiordicum                                  | yes | yes |
| OP541390.1     | Siboglinum fiordicum isolate BC1_2, Kvalsund          | yes | no  |
| OP541391.1     | Siboglinum fiordicum isolate BC2_1, Kvalsund          | yes | no  |
| MK673145.1     | Siboglinum fiordicum isolate NewAS8                   | yes | no  |
| MK673144.1     | Siboglinum fiordicum isolate NewAS9                   | yes | no  |
| OP541393.1     | Siboglinum fiordicum isolate VVG_8, Nordfjord         | yes | no  |
| OR551480.1     | Siboglinum plumosum                                   | yes | yes |
| FJ480399.1     | Siboglinum poseidoni isolate CapG2                    | yes | no  |
| FJ480398.1     | Siboglinum poseidoni isolate CapG40                   | yes | no  |
| FJ483547.1     | Spirobrachia cf. grandis SJ-2009                      | yes | no  |

|            |                                        |     |     |
|------------|----------------------------------------|-----|-----|
| KJ789171.1 | Spirobrachia sp. YL-2014               | yes | yes |
| FJ480371.1 | Spirobrachia tripeira isolate AT622-G2 | yes | no  |
| FJ480373.1 | Spirobrachia tripeira isolate AT622-G5 | yes | no  |
| FJ480374.1 | Spirobrachia tripeira isolate AT622-G6 | yes | no  |
| FJ480375.1 | Spirobrachia tripeira isolate AT622-G7 | yes | no  |
| MT108937.1 | Osedax rubiplumus                      | yes | yes |
